# Supplementary material
Source: HighWire-hosted journal article supplement (https://cmajopen.ca/highwire/filestream/90780/field_highwire_adjunct_files/0/open-2023-0039-1-at.pdf)
Supplement: open-2023-0039-1-at.pdf [file open-2023-0039-1-at.pdf]

## Appendix 1: Supplementary tables

---

**Supplementary Table S1. First Nations community member survey data**

| Survey Question                                                             | n= 12 (%) |
|-----------------------------------------------------------------------------|-----------|
| Do you have experience using EMS yourself?                                  |           |
| Yes                                                                         | 11 (91.7) |
| No                                                                          | 1 (8.3)   |
| Do you have experience using EMS for a child or dependent?                  |           |
| Yes                                                                         | 6 (50.0)  |
| No                                                                          | 6 (50.0)  |
| Do you have experience accompanying others using EMS?                       |           |
| Yes                                                                         | 7 (58.3)  |
| No                                                                          | 5 (41.7)  |
| How many times have you used EMS in the last year (for yourself or others)? |           |
| 0                                                                           | 3 (25.0)  |
| 1                                                                           | 4 (33.3)  |
| 2-5                                                                         | 4 (33.3)  |
| >5                                                                          | 1 (8.3)   |
| Average                                                                     | 2.25      |

**Supplementary Table S2. Paramedic services survey data**

| <b>Survey Question</b>                                                                                                                                                                                                            | <b>n= 28 (%)</b>                                                                                                             |
|-----------------------------------------------------------------------------------------------------------------------------------------------------------------------------------------------------------------------------------|------------------------------------------------------------------------------------------------------------------------------|
| <p><b>Do you currently provide emergency care to First Nations members or communities in Alberta?</b></p> <p>Yes, solely</p> <p>Yes, more than 50% of my job</p> <p>Yes, less than 50% of my job</p> <p>No</p> <p>No Response</p> | <p>5 (17.9)</p> <p>4 (14.3)</p> <p>8 (28.6)</p> <p>9 (32.1)</p> <p>2 (7.1)</p>                                               |
| <p><b>Length of service to First Nations communities:</b></p> <p>1-5 years</p> <p>6-10 years</p> <p>11-15 years</p> <p>16-20 years</p> <p>&gt;20 years</p> <p>No Response</p>                                                     | <p>2 (7.1)</p> <p>3 (10.7)</p> <p>2 (7.1)</p> <p>4 (14.3)</p> <p>6 (21.4)</p> <p>10 (35.7)</p>                               |
| <p><b>What is your profession?</b></p> <p>Advanced Care Paramedic</p> <p>Primary Care Paramedic</p> <p>Paramedic (Unspecified)</p> <p>Manager</p> <p>Physician</p> <p>Policymaker</p> <p>Other</p> <p>No Response</p>             | <p>7 (25.0)</p> <p>1 (3.6)</p> <p>1 (3.6)</p> <p>6 (21.4)</p> <p>3 (10.7)</p> <p>3 (10.7)</p> <p>1 (3.6)</p> <p>6 (21.4)</p> |
| <p><b>Primary Role:</b></p> <p>Clinician</p> <p>Policymaker</p> <p>Health System Leader</p> <p>Community Program Manager</p> <p>Researcher</p> <p>Public Health Practitioner</p> <p>Other</p> <p>No Response</p>                  | <p>8 (28.6)</p> <p>2 (7.1)</p> <p>8 (28.6)</p> <p>3 (10.7)</p> <p>1 (3.6)</p> <p>2 (7.1)</p> <p>2 (7.1)</p> <p>2 (7.1)</p>   |

**Supplementary Table S3. Paramedic Likert survey data**

| Statement                                                                                              | Response n= 26 (%) |                   |             |             |              |                |
|--------------------------------------------------------------------------------------------------------|--------------------|-------------------|-------------|-------------|--------------|----------------|
|                                                                                                        | Do Not Know        | Strongly Disagree | Disagree    | Neutral     | Agree        | Strongly Agree |
| I have a good understanding of the different perspectives of EMS services.                             | -                  | -                 | -           | -           | 13<br>(50.0) | 13<br>(50.0)   |
| I have a good understanding of EMS transitions in care for First Nations.                              | -                  | -                 | 3<br>(11.5) | 4<br>(15.4) | 13<br>(50.0) | 6<br>(23.1)    |
| I have a good understanding of the steps for building rapport with community members and EMS services. | -                  | -                 | 2<br>(7.7)  | 8<br>(30.8) | 11<br>(42.3) | 5<br>(19.2)    |
| I have a good knowledge of the protocols for knowledge exchange with First Nations.                    | -                  | 1<br>(3.8)        | 5<br>(19.2) | 8<br>(30.8) | 6<br>(23.1)  | 6<br>(23.1)    |
| I understand what data is available from the province on EMS use in First Nations communities.         | 1<br>(7.7)         | 2<br>(7.7)        | 7<br>(26.9) | 5<br>(19.2) | 6<br>(23.1)  | 5<br>(19.2)    |
